# Supplementary material for: Carbon-doped ZnO nanostructures synthesized using vitamin C for visible light photocatalysis
Source: Royal Society of Chemistry journal article supplement (doi:10.1039/c0ce00063a), 2010-01-01
Supplement: c0ce00063a.pdf [file c0ce00063a.pdf]

## Electronic Supplementary Information (ESI)

### Carbon-doped ZnO nanostructures synthesized by using vitamin C for visible light photocatalysis

Seungho Cho, Ji-Wook Jang, Jae Sung Lee and Kun-Hong Lee

Department of Chemical Engineering, Pohang University of Science and Technology (POSTECH), San 31, Hyoja-Dong, Nam-Gu, Pohang, Gyungbuk, Korea, 790-784  
E-mail: ce20047@postech.ac.kr

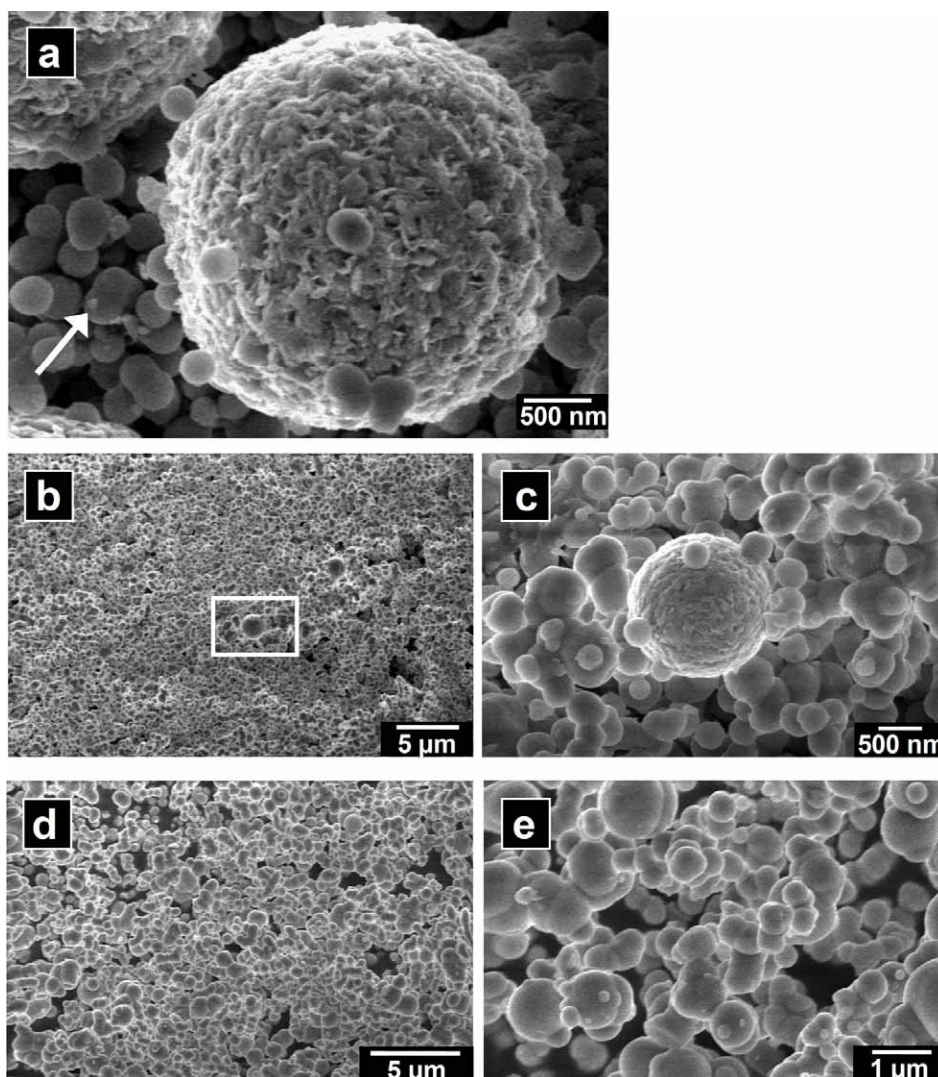

**Figure S1.** SEM images of the ZnO structures formed in a solution of 0.01 M zinc nitrate hexahydrate, 0.01 M HMT, and  $x$  mM vitamin C at 95°C for 1 h: (a)  $x = 0.5$ ; (b) and (c)  $x = 1$ ; (d) and (e)  $x = 20$ .

We characterized the structures obtained in a solution of 0.01 M zinc nitrate hexahydrate, 0.01 M HMT, and 1 mM vitamin C at 95°C for 1 h, followed by calcination in air at 500°C for 2 h:

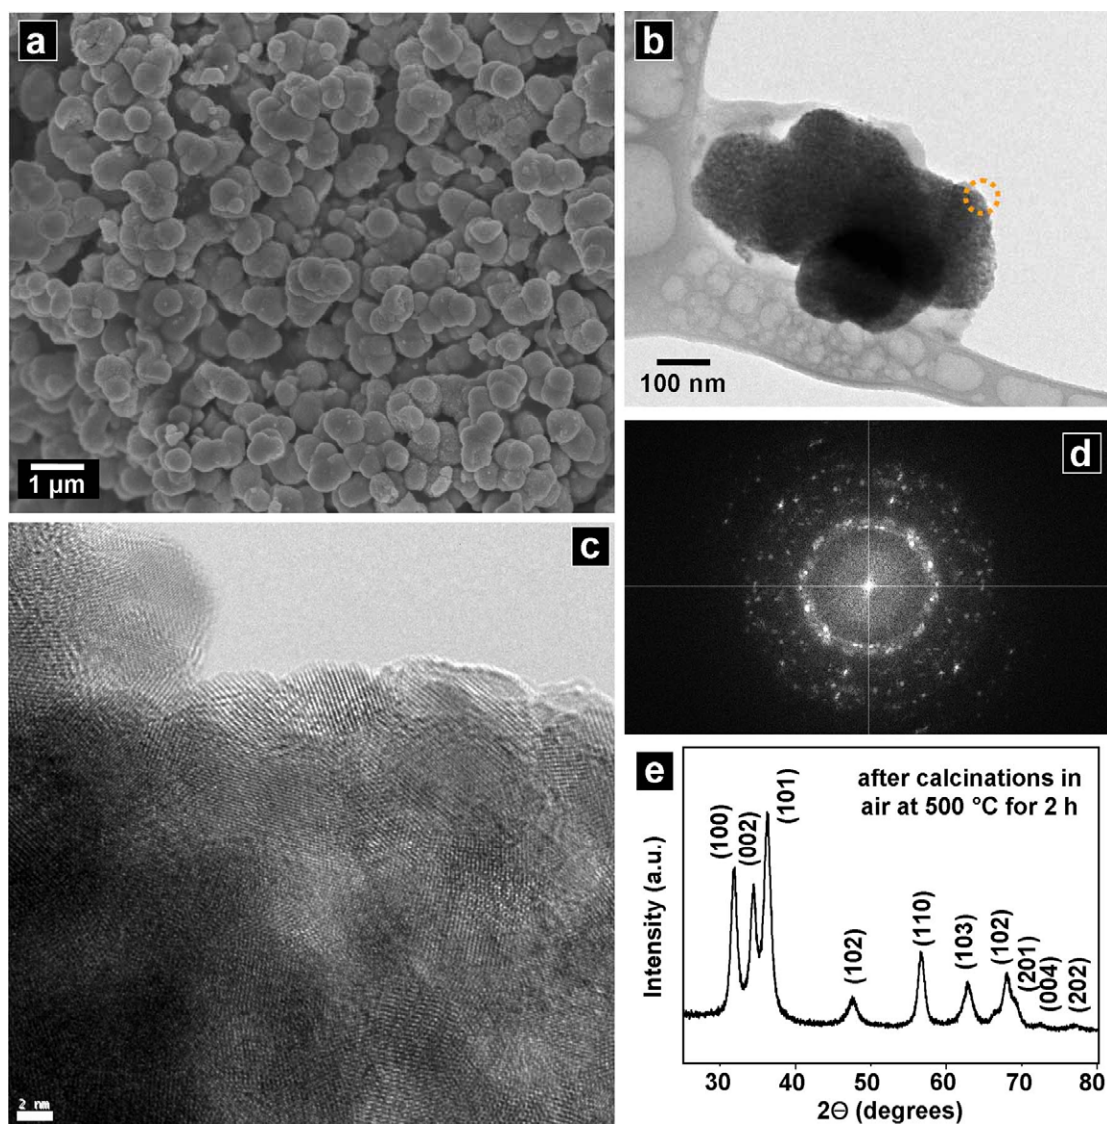

**Figure S2.** (a) SEM image of the structures obtained in a solution of 0.01 M zinc nitrate hexahydrate, 0.01 M HMT, and 1 mM vitamin C at 95°C for 1 h, followed by calcination in air at 500°C for 2 h; (b) TEM image of a structure; (c) HR-TEM image of the area indicated by the circle in (b); (d) The corresponding FFT image of (c); (e) XRD pattern of the powders.

Figures S2(c) and (d) show the structures also were polycrystalline. The carbon concentration in the form of carbide was estimated to be 0.41 at.% by XPS analysis. The crystallite size calculated from the XRD pattern was 7 nm.
